# Supplementary material for: The First Molecular Characterization of Picocyanobacteria from the Argentine Sea
Source: Hindawi journal article supplement (doi:10.1155/2014/237628), 2014-01-01
Supplement: f1 [file 237628.f1.pdf]

420

421 Table SI. Oligonucleotide sequences of primers used in this study

| Primer pair             | Target gene | Sequence 5'-3'                                      | Reference | Amplicon size (bp) |
|-------------------------|-------------|-----------------------------------------------------|-----------|--------------------|
| SYN172F <sup>(a)</sup>  | <i>16S</i>  | AATACCCCATATGCCGMGAG                                | [28]      | 1128               |
| OXY1313R <sup>(a)</sup> | <i>rRNA</i> | CTTCACGTAGGCGAGTTGCAGC                              |           |                    |
| 1F <sup>(b)</sup>       | <i>ntcA</i> | AT(CAT)TT(TC)TT(TC)CC(GATC)GG(GATC)GA(TC)CC(GATC)GC | [29]      | 449                |
| 4R <sup>(b)</sup>       |             | AT(GATC)GC(TC)TC(GATC)GC(AGT)AT(GATC)GC(TC)TG(AG)T  |           |                    |
| 358fGC <sup>(c)</sup>   | <i>16S</i>  | CGCCCGCCGCGCCCCGCGCCCGTCCCGCCGCCCCCGCC              | [30]      | 604                |
|                         | <i>rRNA</i> | CGCCTACGGGAGGCAGCAG                                 |           |                    |
| 907r <sup>(c)</sup>     |             | CCGTCAATTCCTTTGAGTTT                                |           |                    |
| 358f                    | <i>16S</i>  | CCTACGGGAGGCAGCAG                                   | [30]      | 564                |
| 907r                    | <i>rRNA</i> | CCGTCAATTCCTTTGAGTTT                                |           |                    |

422 <sup>(a)</sup> Primer pair that amplifies all sequences from *Synechococcus* sub-clusters 5.1 (clades I–  
 423 X), some of sub-cluster 5.2, all of LL *Prochlorococcus*, some of HLI *Prochlorococcus*, but  
 424 does not amplify sequences from freshwater *Synechococcus* and from HLII  
 425 *Prochlorococcus* strains [8, 28].

426 <sup>(b)</sup> Primer pair used for amplifying conserved regions of *ntcA* genes, typical from  
 427 cyanobacteria

428 <sup>(c)</sup> Universal primers for bacteria used in DGGE experiments for nested-PCR.

429
